# Supplementary material for: NMR-Based Metabolomics in Differential Diagnosis of Chronic Kidney Disease (CKD) Subtypes
Source: MDPI journal article supplement (doi:10.3390/metabo12060490), 2022-05-28
Supplement: s1 [file s1]

# NMR-based metabolomics in differential diagnosis of chronic kidney disease (CKD) subtypes

## Supplementary Material

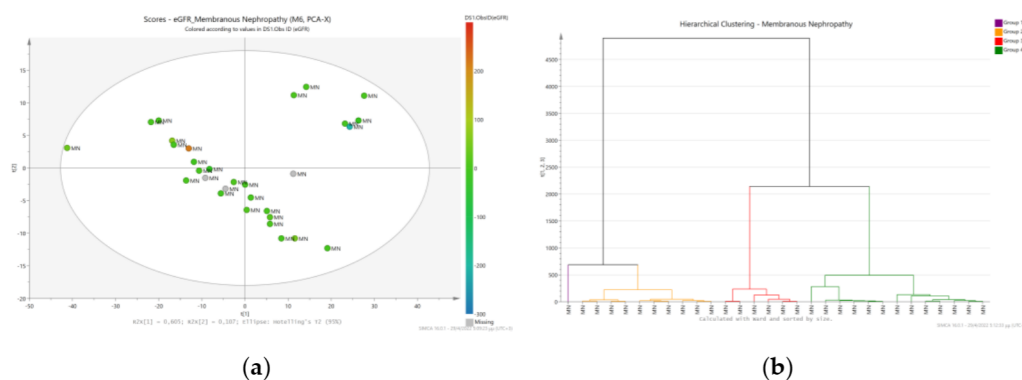

**Figure S1.** Membranous Nephropathy (MN)  $^1\text{H}$  NMR urinary metabolic profile. Unsupervised visualization of cluster tendency. (a) PCA 2D scores plot of MN applied on the data set of 30  $^1\text{H}$  CPMG NMR urine spectra; spheres are colored according to the eGFR value via heatmap visualization. (b) PCA-Hierarchical Clustering on the same MN metabolic NMR profiles.

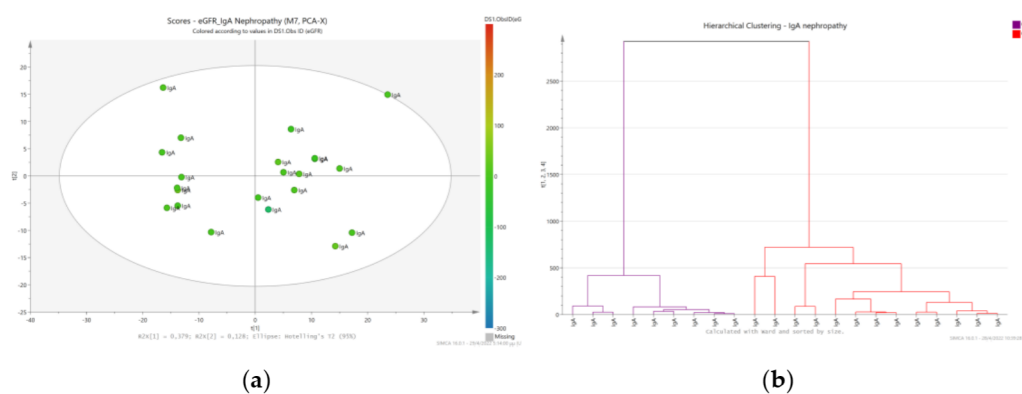

**Figure S2.** IgA Nephropathy (IgAN)  $^1\text{H}$  NMR urinary metabolic profile. Unsupervised visualization of cluster tendency. (a) PCA 2D scores plot of IgAN applied on the data set of 22  $^1\text{H}$  CPMG NMR urine spectra; spheres are coloured according to the eGFR value via heatmap visualization. (b) PCA-Hierarchical Clustering of the IgAN metabolic NMR profiles.

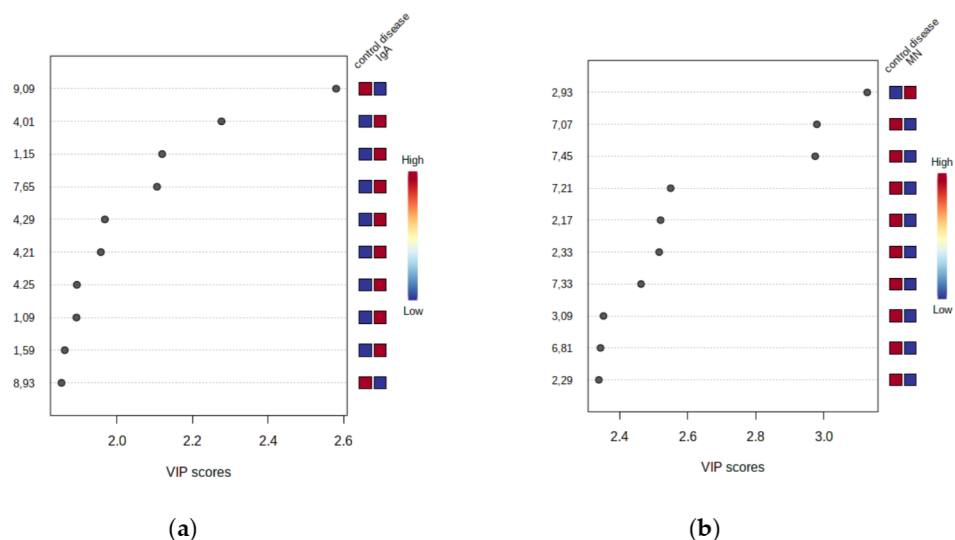

**Figure S3.** Statistically significant features of the glomerulonephritis subtypes comparison with the control disease patients. The first 10 VIP scores of the first PLS-DA Latent Variable indicating the variables of importance between (a) IgAN and (b) MN and control disease patients' metabolic profile respectively.

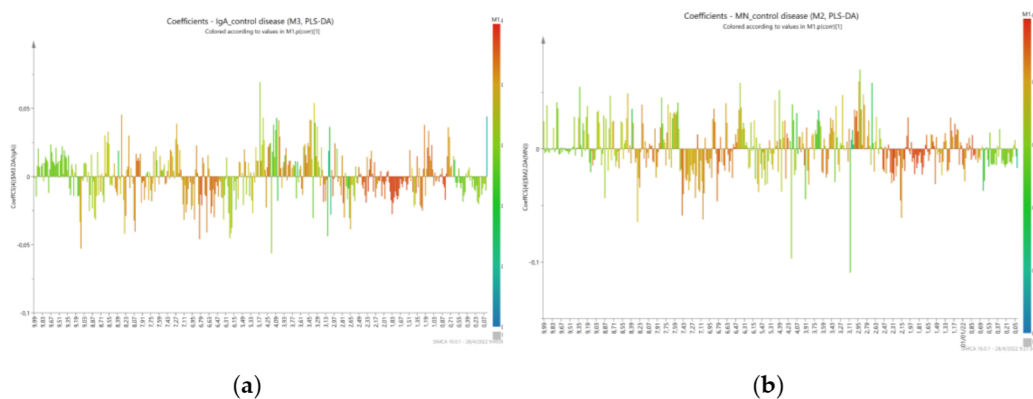

**Figure S4.** PLS-DA coefficients' plot for the classification which reveals the relative intensities between the two examined groups. (a) IgAN and control disease and (b) MN and control disease patients. The color-coded correlation coefficients indicate the significance of the metabolites in terms of their contribution to the separation between the two groups.
